# Supplementary material
Source: PubMed Central journal article supplement (PMC4790777)

## The Intervention

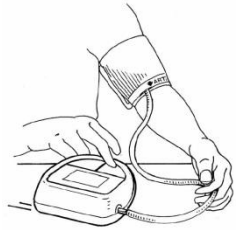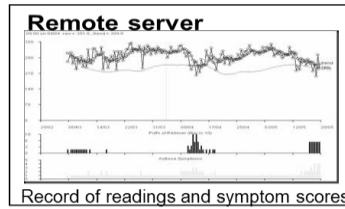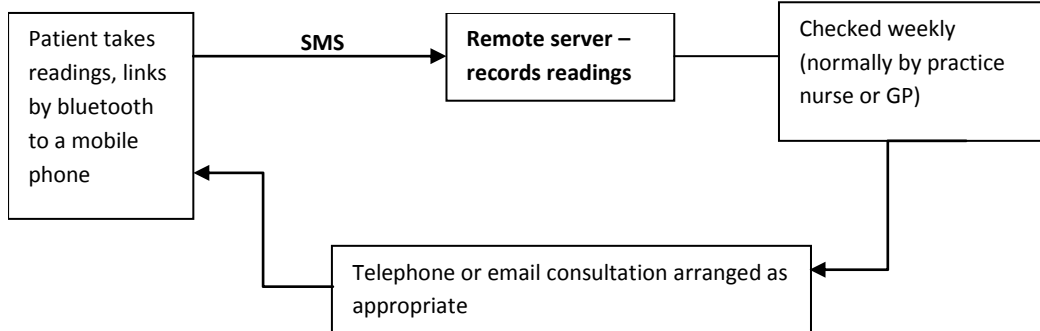

Screenshot of the intervention as seen by the clinician. People with high blood pressure are highlighted

The screenshot shows the I.E.M. e-health service interface. The main content area displays a table of patient records. The table has columns for ID, Surname, First Name, Postal Code, Location, E-mail, Date of birth, Phone, Avg. B, and last alarm. The 'Avg. B' column contains blood pressure readings, with three rows highlighted in yellow: 138 / 95 (111), 148 / 79 (71), and 138 / 81 (76). A black circle is drawn around the 'Avg. B' column. The interface also includes a search bar, navigation icons, and user information (User: Brian McKinstry, Patient: Demo Set, Location: Patient list).

| ID   | Surname  | First Name | Postal Code | Location | E-mail                 | Date of birth | Phone | Avg. B         | last alarm |
|------|----------|------------|-------------|----------|------------------------|---------------|-------|----------------|------------|
| 6283 | C        | L          |             | set 4    |                        | 21.11.89      |       | 138 / 95 (111) | 23.09.2009 |
| 7958 | Demo     | Kir2       |             | Set 5    |                        |               |       | 148 / 79 (71)  |            |
| 5958 | Paterson | Mary       |             | Set 7    | mary.paterson@ed.ac.uk |               |       | 125 / 79 (72)  | 03.01.2009 |
| 6894 | Set      | Demo       |             | Set 15   |                        |               |       | 138 / 81 (76)  |            |
| 5801 | smith    | john       |             |          |                        |               |       | 125 / 75 (75)  |            |
| 7322 | Test     | Penicuk    |             | Set 6    |                        |               |       | 123 / 82 (81)  | 24.09.2009 |

Data could be presented in a variety of ways

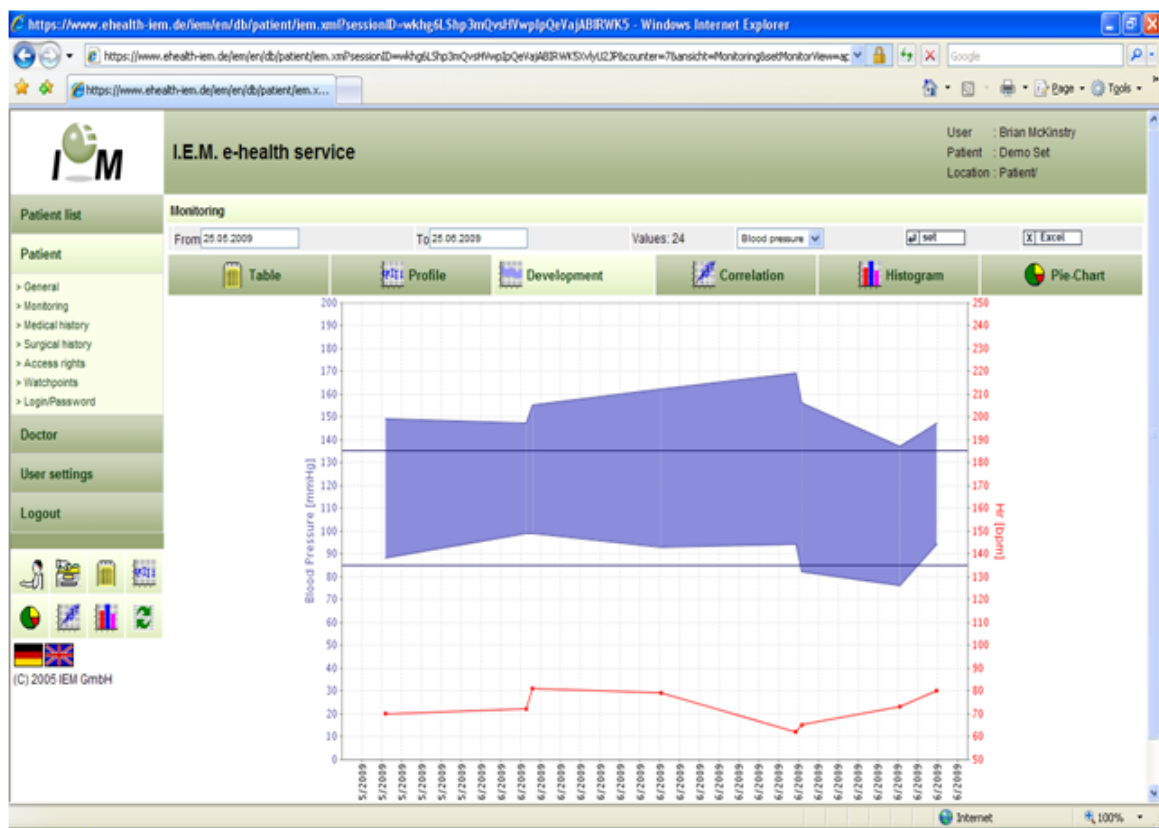



## I.E.M. e-health service

User : Brian McKinstry  
 Patient : Demo Set  
 Location : Patient/

---

**Patient list**

**Patient**

- > General
- > Monitoring
- > Medical history
- > Surgical history
- > Access rights
- > Watchpoints
- > Login/Password

**Doctor**

**User settings**

**Logout**

(C) 2005 IEM GmbH

**Monitoring**

From  To  Values: 24 Blood pressure

Blood Pressure [mmHg]

HR [bpm]



Supplement: mckb007056.ww1_default.pdf [file mckb007056.ww1_default.pdf]
